# Supplementary material for: Energy-storage performance of NaNbO3 based multilayered capacitors
Source: Royal Society of Chemistry journal article supplement (doi:10.1039/d1tc01826d), 2021-01-01
Supplement: d1tc01826d1.pdf [file d1tc01826d1.pdf]

## Energy-storage performance of NaNbO<sub>3</sub> based multilayer capacitors

Li-Feng Zhu<sup>1,2,3</sup>, Yongke Yan<sup>\*2</sup>, Haoyang Leng<sup>2</sup>, Xiaotian Li<sup>2</sup>, Li-Qian Cheng<sup>2</sup>,

Shashank Priya<sup>\*2</sup>

<sup>1</sup> School of Materials Science and Engineering, University of Science and Technology Beijing, Beijing 100083, China.

<sup>2</sup> Department of Materials Science and Engineering, The Pennsylvania State University, University Park, PA 16802, United States

<sup>3</sup> Foshan (Southern China) Institute for New Materials, Foshan, Guangdong, 528200, China.

Figure S1 shows the XRD spectra of the NN-0.4CZ-*x*BNT ceramics at  $0.12 \leq x \leq 0.18$ . All samples exhibit pure perovskite structure without noticeable any impurity phase within the detectable limit of the XRD, suggesting the formation of a stable solid solution. The standard diffraction peaks cited from NaNbO<sub>3</sub> with the orthorhombic phase (*O*-phase, PDF#33-1270, P<sub>6</sub>mm, antiferroelectric phase) and cubic phase (*C*-phase PDF#75-2102, Pm-3m, paraelectric phase) are indicated by vertical lines for comparison. The diffraction peaks of the samples at  $0.12 \leq x \leq 0.18$  correspond well to *C* phase. However, different the PDF#75-2102 of *C* phase, there are two peaks around 46.5° and 58°, respectively, in the samples at  $0.12 \leq x \leq 0.18$  as

---

Corresponding author: [yxy355@psu.edu](mailto:yxy355@psu.edu) (Yongke Yan)

Corresponding author: [sup103@psu.edu](mailto:sup103@psu.edu) (Shashank Priya)

shown in Fig.S1b. This shows that the phase structure of samples at  $0.12 \leq x \leq 0.18$  is not a single *C* phase, but consists of *C* and *O* two phases, In addition, the characteristic peaks around  $36.5^\circ$  of the antiferroelectric *O* phase are also found in all samples as shown in Fig.S2, which further proves that the antiferroelectric *O* phase exists in the samples of  $0.12 \leq x \leq 0.18$ .

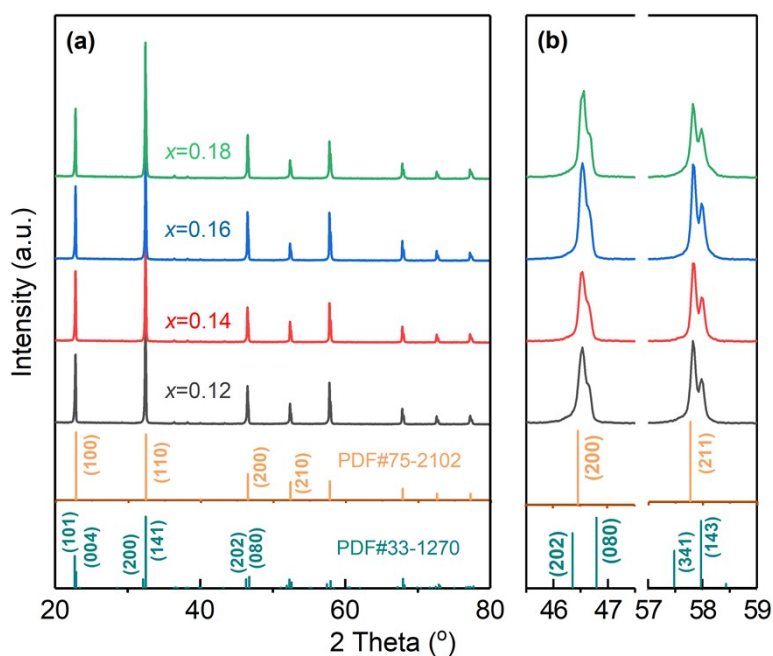

Figure S1 X-ray diffraction patterns of the NN-0.04CZ-xBNT ceramics with different *x* content ( $0.12 \leq x \leq 0.18$ ) in a selected  $2\theta$  range of  $20^\circ$ - $80^\circ$  (a),  $45.5^\circ$ - $47.5^\circ$  and  $57^\circ$ - $59^\circ$  (b)

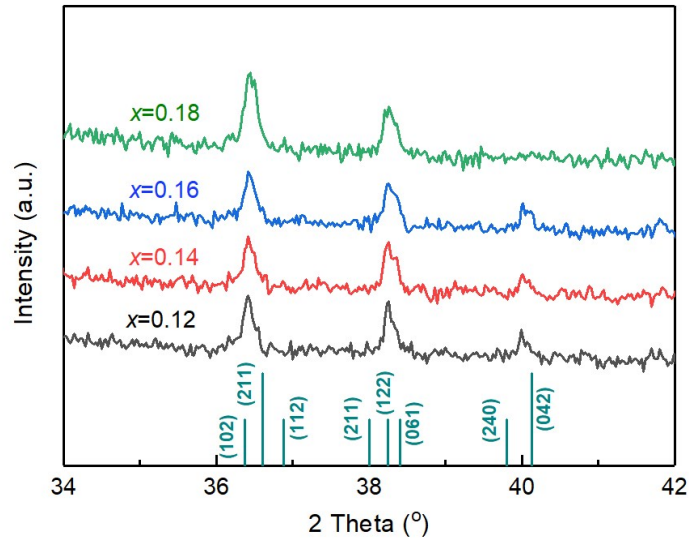

Figure S2 X-ray diffraction patterns of the NN-0.04CZ- $x$ BNT ceramics with different  $x$  content ( $0.12 \leq x \leq 0.18$ ) in a selected  $2\theta$  range of  $34^\circ$ - $42^\circ$

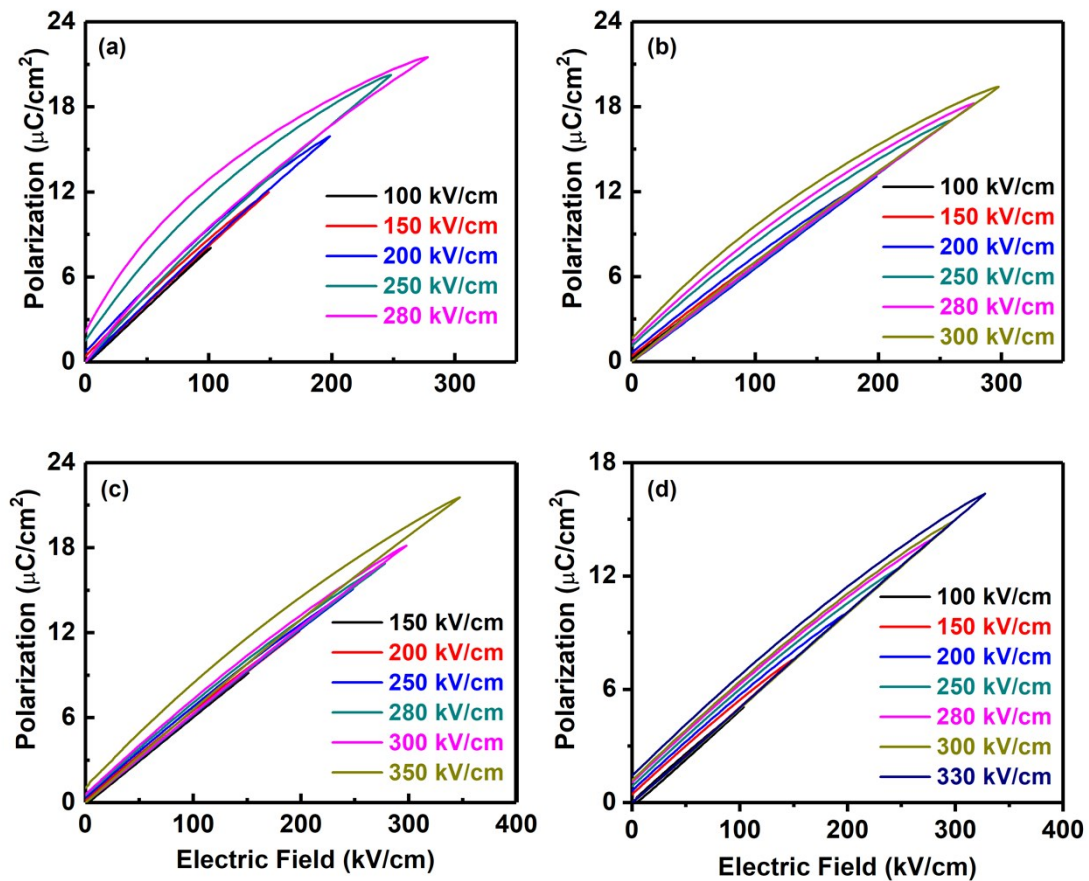

Figure S3 Unipolar P-E loops of NN-0.04CZ- $x$ BNT ceramics with different  $x$  content,  $x=0.12$  (a),  $x=0.14$  (b),  $x=0.16$  (c), and  $x=0.18$  (d)

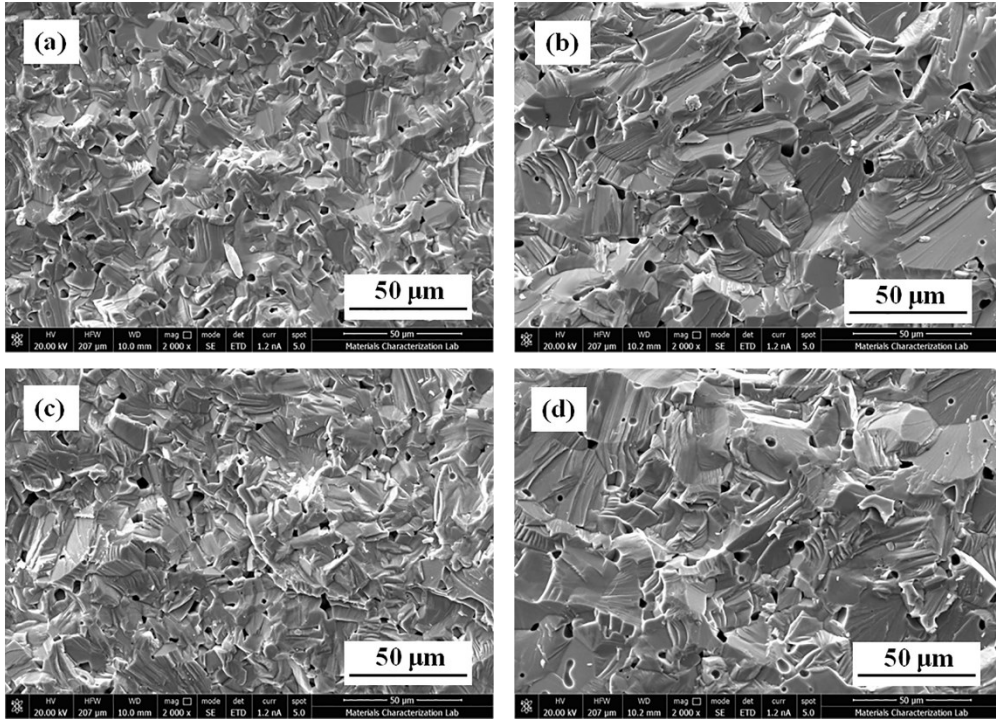

Figure S4 SEM images of fracture surface for 0.80NN-0.04CZ-0.16BNT ceramics with different  $x$  content,  $x=0.12$  (a),  $x=0.14$  (b),  $x=0.16$  (c), and  $x=0.18$  (d)

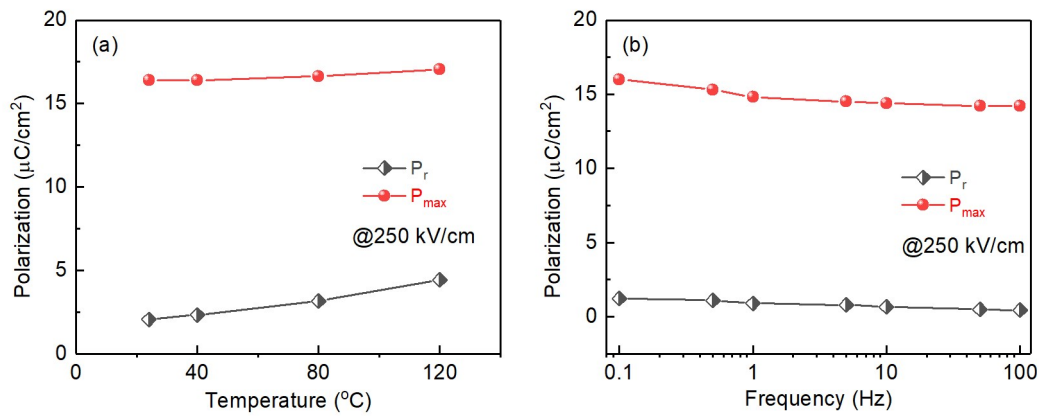

Figure S5 Variation of  $P_{max}$  and  $P_r$  versus the temperature (a) and frequency (b) for 0.80NN-0.04CZ-0.16BNT ceramics
